# Supplementary material for: TET2-mediated epigenetic reprogramming of breast cancer cells impairs lysosome biogenesis
Source: Life Sci Alliance. 2022 Mar 29;5(7):e202101283. doi: 10.26508/lsa.202101283 (PMC8963717; doi:10.26508/lsa.202101283)
Supplement: Supplementary file 1 [file LSA-2021-01283_TableS1.xlsx]

## Sheet: Feuil1
Table S1
(O: oncogene, TS: tumor suppressor)
Top_60 TET2 CD down-regulated genes
geneSymbol	log2FoldChange	pval	adjPval	EV.rep1.norm	EV.rep2.norm	EV.rep3.norm	TET2_CD_rep1.norm	TET2_CD_rep2.norm	TET2_CD_rep3.norm	O/TS
C1orf21	-3.4239	1.35e-132	1.24e-129	4158.57	3729.43	3631.81	375.026	343.889	302.117
USP2-AS1	-5.36891	1.42e-87	4.88e-85	548.692	496.366	512.045	12.6962	7.31679	3.49268
SEMA3D	-3.77444	9.97e-86	3.27e-83	3380.99	2748.39	2407.39	182.63	163.408	213.054	O
LINC00052	-5.84397	1.86e-75	4.84e-73	299.952	301.663	442.103	2.92989	2.43893	0	O
TMEM229B	-2.19832	1.66e-72	3.8e-70	584.227	645.944	626.025	135.751	130.889	126.61
NOVA1	-3.69727	3.2e-70	7.11e-68	403.42	403.61	473.188	33.2054	29.2672	23.5756	O
SLC27A6	-2.52266	8.46e-67	1.6e-64	655.296	523.942	493.048	99.6162	82.9236	96.0488	O
KYNU	-2.65684	1.13e-65	1.98e-63	15912.1	13950	12375.4	2455.25	2078.78	1852.87
MUC15	-5.09755	2.84e-60	4.25e-58	234.109	280.772	179.604	2.92989	3.25191	2.61951	O
ZMAT1	-4.14872	2.13e-58	3.03e-56	266.508	230.635	249.546	7.81303	10.5687	12.2244
DMKN	-2.47916	3.68e-57	5.07e-55	1752.68	1708.03	1882.39	398.465	280.477	238.376	O
KAL1	-2.63691	6.04e-57	8.24e-55	606.175	563.216	583.714	89.8499	85.3626	90.8098	O
SOX2	-6.93937	4.1e-105	2.17e-102	742.041	649.286	786.632	0.976629	3.25191	3.49268	O
BEX4	-2.91311	6.31e-70	1.38e-67	916.578	849.003	731.37	106.453	119.508	87.3171	O
ARSK	-2.45104	1.43e-69	3.08e-67	604.084	586.614	642.431	89.8499	115.443	117.878
HTR2C	-5.19334	1.27e-66	2.36e-64	333.396	304.17	294.447	0.976629	6.50382	9.60488	O
RHOBTB3	-2.6043	5.63e-64	9.57e-62	46860.4	51759.1	57128.9	6758.27	8182.61	9526.3	O
SGCG	-8.28613	2.68e-181	9.22e-178	1857.19	2028.08	1879.8	2.92989	0.812977	0.873171
GPC4	-4.58697	3.21e-166	6.33e-163	3516.86	3419.41	3160.35	144.541	143.897	92.5561	O
SLC6A14	-6.00895	1.9e-138	2.02e-135	6196.57	6785.34	6755.89	82.0368	73.9809	71.6	O
DSCAM-AS1	-2.78978	6.41e-126	5.2e-123	24762.2	26065	31464.4	3970.97	3577.91	4027.06	O
GYG2	-3.45727	1.94e-125	1.49e-122	1261.47	1087.99	987.824	95.7096	93.4923	99.5415
GPER1	-3.73448	5.36e-113	3.7e-110	5785.83	5634.67	7122.87	444.366	425.187	422.615	O
RUNDC3B	-3.65835	1.91e-112	1.25e-109	732.635	605.833	646.748	42.9717	57.7214	44.5317
COLEC12	-5.01544	3.2e-111	2.01e-108	1683.7	1604.41	1278.82	58.5977	30.0801	27.9415
ARMCX1	-2.59063	6.92e-110	3.97e-107	1503.94	1504.97	1671.7	207.045	278.038	269.81	TS
STC1	-4.16194	4.91e-105	2.51e-102	4356.1	5909.59	5350.14	288.106	237.389	247.107	O
APLP1	-3.29407	1.57e-99	7.22e-97	1894.82	2206.07	2074.08	208.999	209.748	175.507
SEMA6B	-3.71451	1.05e-98	4.69e-96	791.162	904.99	781.451	56.6445	69.916	46.2781	O
STXBP1	-2.15145	4.42e-98	1.9e-95	2832.3	2960.65	2894.39	611.37	655.259	656.625
PCDH10	-2.85571	5e-96	2.03e-93	22099.2	21945.4	23426.3	2417.16	3161.67	3381.79	TS
JPH3	-4.8892	1.87e-91	6.97e-89	609.31	646.779	575.943	16.6027	16.2595	13.9707	TS
SLC7A8	-3.16474	5.3e-89	1.92e-86	994.962	1235.06	1261.55	140.635	116.256	111.766
KNDC1	-3.51898	5.91e-85	1.9e-82	515.248	588.285	508.591	49.8081	44.7137	34.9268
MEIS3	-3.54077	1.39e-84	4.36e-82	1417.19	1332	1303.86	126.962	100.809	90.8098
CRLF1	-4.15544	3.95e-84	1.21e-81	1280.28	1496.62	1358.26	90.8265	47.1527	62.8683	O
PLXND1	-1.89066	2.15e-81	6.16e-79	19695.4	21179.1	19244.4	5227.89	4871.36	5900.89	O
ABLIM1	-2.80148	2e-78	5.51e-76	1154.87	1027.83	1122.53	125.985	139.019	186.859
TNNT1	-2.80024	1.02e-74	2.6e-72	2358.86	1951.2	2055.95	335.96	289.42	245.361	O
SERPINA1	-4.09858	2.23e-74	5.5e-72	501.662	546.504	373.024	23.4391	28.4542	17.4634	O
DCLK1	-4.5827	9.28e-74	2.24e-71	2317.05	1694.66	1673.43	83.0135	56.9084	47.1512	O
EVL	-2.94537	7.51e-73	1.78e-70	17010.5	16005.7	17029.6	2201.32	2094.23	1832.79	O
CA5B	-2.24313	7.11e-72	1.61e-69	1661.75	1597.73	1663.07	354.516	296.737	363.239
AMIGO2	-3.72354	1.75e-68	3.59e-66	8532.43	9629.83	7987.21	509.8	614.611	609.473	O
MECOM	-3.27425	5.35e-68	1.07e-65	1020.05	1003.59	971.418	83.0135	117.069	81.2049	O
CERS4	-3.01215	7.97e-68	1.57e-65	2505.17	2799.37	2286.5	303.732	333.321	242.742
EFNB3	-3.13391	1.19e-67	2.31e-65	802.659	774.631	746.049	63.4809	111.378	68.1073	O
MUC1	-2.57142	7.57e-67	1.45e-64	8563.78	10625.1	9083.83	1377.05	1424.34	1758.57	O
PLXNA4	-4.33482	4.31e-66	7.92e-64	1393.16	1334.5	1196.79	41.0184	44.7137	65.4878	O
SOX3	-3.77527	4.35e-64	7.5e-62	435.819	387.733	547.448	30.2755	18.6985	34.9268	O
SCD5	-3.06149	1.08e-62	1.77e-60	1663.84	1674.61	1137.21	138.681	187.798	168.522	O
KIF1A	-3.69525	2.18e-62	3.54e-60	2066.22	2033.93	2050.77	177.746	134.954	100.415
TBC1D9B	-1.00293	3.2e-62	5.14e-60	13337.9	14922.7	13352	6835.43	7080.22	6795.89
ARMCX4	-4.97182	1.31e-61	2.02e-59	339.667	461.269	563.854	7.81303	10.5687	6.98537
GRIK2	-4.46467	2.17e-60	3.28e-58	357.434	310.02	343.666	9.76629	11.3817	12.2244	TS
CARNS1	-3.2791	4.37e-60	6.47e-58	229.928	223.949	253.864	24.4157	19.5114	21.8293
TATDN2P3	-6.20498	1.86e-57	2.59e-55	320.854	315.869	471.461	0	0	0
CECR2	-4.56095	1.52e-56	2.03e-54	388.788	324.225	494.775	9.76629	14.6336	12.2244
CALCR	-3.73762	5.57e-56	7.38e-54	1188.31	1469.88	1540.45	70.3173	92.6794	99.5415	O
PDE9A	-4.20138	1.05e-55	1.37e-53	419.097	396.925	285.813	14.6494	18.6985	12.2244	O
Top_60 TET2 CD up-regulated genes
geneSymbol	log2FoldChange	pval	adjPval	EV.rep1.norm	EV.rep2.norm	EV.rep3.norm	TET2_CD_rep1.norm	TET2_CD_rep2.norm	TET2_CD_rep3.norm	O/TS
SCIN	6.26011	2.36e-259	3.25e-255	137.957	165.455	176.15	13925.8	13978.3	15457.7	O
SPANXA1	8.18228	2.52e-212	1.16e-208	6.27077	5.84943	10.3618	3603.76	3519.38	2841.3	TS
SPANXA2	8.18228	2.52e-212	1.16e-208	6.27077	5.84943	10.3618	3603.76	3519.38	2841.3
CAPN9	4.4587	1.24e-179	3.41e-176	160.95	183.003	135.567	3224.83	4341.3	3871.64	TS
MROH2A	6.69502	1.85e-174	4.25e-171	25.0831	20.8908	16.4062	3418.2	2503.97	2371.53
NPR1	4.88187	2.93e-164	5.06e-161	43.8954	46.7954	40.5837	1610.46	1256.05	1470.42
NFIA	4.16192	1.98e-158	3.03e-155	66.8882	64.3437	70.8055	1291.1	1230.03	1321.11
FSTL1	4.68161	3.89e-156	5.36e-153	55.3918	44.2885	34.5393	1195.39	1175.56	1366.51	TS
CRIP1	6.33482	8.55e-152	1.07e-148	238.289	238.155	213.28	19733.8	23192.6	30590.7	TS
KLHL7	2.25419	1.1e-143	1.26e-140	332.351	346.787	318.625	1487.41	1636.52	1695.7
HOXC10	3.39568	9.09e-136	8.95e-133	293.681	321.718	286.676	2795.11	3675.47	3464.74	O
MUC5AC	6.65143	1.47e-132	1.26e-129	50.1662	64.3437	37.1297	7498.56	7572.88	8284.65
CAV1	2.8378	4.29e-115	3.11e-112	1939.76	2193.54	1751.14	15459.1	14123.8	13842.4	TS and O
MMP14	5.73708	1.48e-110	8.87e-108	11.4964	26.7402	25.041	1128.01	1542.22	1796.11	O
C4orf19	2.9913	3.34e-105	1.84e-102	74.2041	78.5494	87.2117	653.365	615.424	743.942
LINC00857	5.1917	9.32e-103	4.59e-100	10.4513	10.0276	9.49831	426.787	530.874	454.049	O
H19	5.58549	2.37e-102	1.13e-99	281.14	391.912	258.181	21733.9	26664	11809.6	TS and O
CHST3	3.14569	1.09e-97	4.55e-95	291.591	345.116	348.847	3251.2	2668.19	3270.03
C12orf56	5.34386	5.9e-96	2.32e-93	8.36103	2.5069	8.63482	404.324	386.977	381.576
PKP1	2.50045	4.98e-92	1.91e-89	577.956	674.355	638.113	3762.95	3477.1	3754.64	TS
CYP26B1	4.513	1.38e-87	4.88e-85	25.0831	29.2471	35.4028	782.28	747.939	950.01
GSTO2	1.65573	2.48e-86	8.33e-84	546.602	500.544	524.997	1653.43	1741.4	1595.28
MYL9	7.40695	4.81e-84	1.44e-81	0	0	0	443.39	432.504	462.781	O
ASCC1	1.89	7.95e-84	2.33e-81	1321.04	1220.86	1204.56	4380.18	5194.11	4482.86
TRPM2	7.63599	1.43e-79	4.02e-77	0	0	0	1355.56	643.065	587.644
CDCA7L	3.092	1.15e-77	3.12e-75	363.705	344.281	357.482	2616.39	3451.09	3608.82	O
SCARA5	4.08552	3.66e-76	9.71e-74	16.7221	40.946	35.4028	589.884	601.603	635.668	TS
PARVB	3.29709	1.1e-74	2.75e-72	41.8051	50.1379	48.355	517.613	439.008	527.395	TS
PVT1	2.0895	1.42e-72	3.31e-70	493.301	507.229	442.103	2294.1	2003.99	1971.62	TS
SPANXC	6.12831	2.61e-69	5.54e-67	5.22564	6.68506	3.45393	839.901	686.153	440.078	O
MEIS1	2.66521	1.09e-68	2.28e-66	126.461	166.291	124.341	759.817	1003.21	1014.62
CT45A2	6.8319	2.33e-68	4.73e-66	0	0	0	258.807	269.095	317.834
S100P	3.72135	8.48e-66	1.54e-63	488.075	454.584	405.837	7396.01	7304.6	5684.34	O
COX20	1.51025	9.78e-66	1.75e-63	546.602	599.984	553.492	1810.67	1589.37	1489.63
AC110619.1	2.85024	1.07e-65	1.89e-63	174.536	174.647	173.56	1189.53	1428.4	1377.86
IFIT5	2.31108	1.46e-63	2.45e-61	256.056	267.402	243.502	1353.61	1122.72	1455.58	O
PEG10	4.77667	1.48e-63	2.46e-61	106.603	105.29	146.792	3888.94	4130.74	5746.34	O
PARP10	4.56858	4.14e-62	6.55e-60	48.0759	49.3023	62.1707	1285.24	1495.06	2185.55	TS
SLC5A12	3.29402	1.12e-61	1.75e-59	52.2564	42.6173	58.7168	424.834	569.897	619.078
C1orf116	5.04849	1.29e-60	1.98e-58	33.4441	35.0966	34.5393	2599.79	1437.34	904.605
KLF4	2.61997	1.39e-59	2.03e-57	965.699	986.046	911.837	8001.52	5374.59	5145.6	TS and O
CIB2	4.34219	3.25e-59	4.72e-57	14.6318	11.6989	15.5427	396.511	379.66	281.161	TS
CEACAM6	3.07991	8.18e-59	1.17e-56	270.688	278.266	218.461	2318.52	2914.52	1842.39	O
ALDH3A1	5.84564	1.59e-57	2.23e-55	4.18051	7.52069	2.59045	733.448	854.439	406.898
SGCE	2.93881	7.26e-57	9.8e-55	58.5272	53.4805	35.4028	374.049	396.733	442.698
SLC6A3	4.41627	2.83e-53	3.46e-51	8.36103	8.35632	10.3618	292.989	232.511	251.473
PCDHB5	4.68858	2.94e-53	3.56e-51	12.5415	16.7126	13.8157	348.657	543.069	679.327
AC110619.2	2.98731	5.57e-53	6.62e-51	456.721	431.186	436.922	3583.25	4131.55	3741.54
MSL3P1	1.61063	5.97e-53	7.03e-51	786.982	766.275	708.055	2735.54	2126.75	2131.41
IFI27	5.09184	6.76e-53	7.83e-51	21.9477	13.3701	20.7236	788.14	612.985	1650.29	O
MRPL23-AS1	4.94244	6.94e-53	7.97e-51	9.40616	5.84943	6.04438	275.409	393.481	291.639
MCAM	4.31154	2.46e-52	2.74e-50	24.038	25.9046	23.314	488.314	543.882	877.537	O
SLC12A4	2.48355	3.03e-52	3.34e-50	364.75	354.308	268.543	1755	1922.69	2115.69
VSIG2	5.55963	6.12e-51	6.49e-49	8.36103	2.5069	0.863482	301.778	388.603	447.064
GCNT1	1.81607	9.3e-51	9.71e-49	484.94	508.064	494.775	1621.2	1825.95	1892.16	O
LAMB3	3.66861	9.53e-50	9.59e-48	299.952	319.212	276.314	5208.36	4373.82	3977.29
CT45A1	6.10218	2.07e-49	2.07e-47	0	0	0	194.349	134.141	211.307	O
STS	1.82955	2.51e-49	2.49e-47	649.025	631.738	604.438	2584.16	2270.64	1983.84
CTB-167G5.5	3.49591	4.68e-49	4.57e-47	81.52	85.2345	47.4915	632.856	1169.87	1018.12
OLFML3	2.94441	1.82e-48	1.77e-46	35.5344	30.0828	26.768	229.508	267.469	274.176	O
