# Supplementary material for: TET2-mediated epigenetic reprogramming of breast cancer cells impairs lysosome biogenesis
Source: Life Sci Alliance. 2022 Mar 29;5(7):e202101283. doi: 10.26508/lsa.202101283 (PMC8963717; doi:10.26508/lsa.202101283)
Supplement: Supplementary file 2 [file LSA-2021-01283_TableS2.xlsx]

## Sheet: Feuil1
Table S2: siRNAs (OriGene) and qPCR primers (SIGMA-ALDRICH)
siRNAs	Target	Sequence
	ABCE1	SR304089B: rArGrArArGrUrArCrCrArGrUrUrCrUrArArArUrGrUrCrAGT
	ABCE1	SR304089C: rGrGrCrUrArGrArArArGrUrArUrGrGrUrUrUrArArCrUrGGA
	TET1	SR312887A : rArGrCrUrCrArCrArGrArGrArArUrCrUrArArArGrUrCrATA
	TET1	SR312887B : rGrGrArArArCrGrCrArArUrArArGrGrArUrArGrArArArUAG
	TET2	SR324291B : rArGrCrArArArGrGrUrArCrUrUrGrArUrArCrArUrArArCCA
	TET2	SR324291C : rArArUrGrUrGrGrCrArGrCrUrArUrUrArGrArGrArArArUCA
	TET3	SR316342A : rCrGrArArCrArArArUrArGrUrGrGrArGrArArArGrArUrGAA
	TET3	SR316342B : rGrCrArGrUrUrArArGrArUrArGrCrGrGrArArCrGrCrCrGAA
RT-qPCR	Name	Sequence
	DSCR8_Up	CAAAAATGAAGGAGCCTGGA
	DSCR8_Do	ACCACTGCACTCCAGCAGTA
	MCAM_Up	CGCACACAGCTGGTCAAC
	MCAM_Do	CCTGACGCTTCACAAGACAG
	SEMA6B_Up	GTGCGCCAACTACAGCATAG
	SEMA6B_Do	AAGAGCATCCCGTCAGAGAA
	SOX2_Up	TACAGCATGATGCAGGACCA
	SOX2_Do	GTACTGCAGGGCGCTCAC
	ABCE1_Up	TTGCAGAGATTTGCTTGTGC
	ABCE1_Do	GCCTTTAAACGCTGCTTGAC
	DDX58 1_Up	TGTTGAAACAGAAGATCTTGAGGA
	DDX58 1_Do	CACTTCTGAAGGTGGACATGAA
	OAS1_Up	CTGAGGCCTGGCTGAATTAC
	OAS1_Do	TCGTCTGCACTGTTGCTTTC
	OAS2_Up	AGAATCTCTTTCGAGGTGCTG
	OAS2_Do	CCAGGACTGGCATTTGTCTT
	IFIT1_Up	ACACCTGAAAGGCCAGAATG
	IFIT1_Do	TCCTCACATTTGCTTGGTTG
	CDK8 Up	TCCTGCAGATAAAGATTGGGAAG
	CDK8 Do	CTTGATAAGGCTGCAGTTGGT
	CTSD_Up	CACAAGTTCACGTCCATCCG
	CTSD_Do	TGCCAATCTCCCCGTAGTAC
	JPH3_Up	CCAGAAATCCTTGCCTGTCG
	JPH3_Do	GCAAGATCACCATGACCACC
	LHX2_Up	CAAGATCTCGGACCGCTACT
	LHX2_Do	GAAACAGGTGAGCTCCGACT
	H19_Up	TCCTGAACACCTTAGGCTGG
	H19_Do	TCATGTTGTGGGTTCTGGGA
	CLN3_Up	CGTCCTGGTTGCCTTTTCTC
	CLN3_Do	CAGTGAGGGAGAGGAAGGTG
	NAGLU_Up	GAGATAGACTGGATGGCGCT
	NAGLU_Do	TTGATCTCTGCCTGGGTCAG
	HERV-FC1_Up	TTTCCCACCGCTGGTAATAG
	HERV-FC1_Do	AGGCTAAGGATTCGGCTGAG
	LTR12C_Up	AGCTAGACATAAAGGTCCTCCACG
	LTR12C_Do	TGGGGCCTTGGAGAACTTTTATG
	TET1_Up	TGCCAGCAGAAGACCAACTGTG
	TET1_Do	AACCTCCAGAGGCACAACAACAG
	TET2_Up	AGAAAGGAGACCCGACTGCAAC
	TET2_Do	ATGTTTGCCAGCCTCGTTCTCG
	TET3_Up	AGCAAGACACCTCGCAAGTTCC
	TET3_Do	TCTTCCGGAGCACTTCTTCCTC
ChIP-qPCR	Name	Sequence
	JPH3_forward	GAGTCCGTTTTCACCGTTTG
	JPH3_reverse	ACCCTCCGTCGTCAAAATTA
	LHX2_forward	GCGCACTGATCAATCACC
	LHX2_reverse	GGAGAAAGTGAGGCCAGACC
